# Supplementary material
Source: HighWire-hosted journal article supplement (https://drc.bmj.com/content/8/1/e001518)
Supplement: inline-supplementary-material-6 [file inline-supplementary-material-6.pdf]

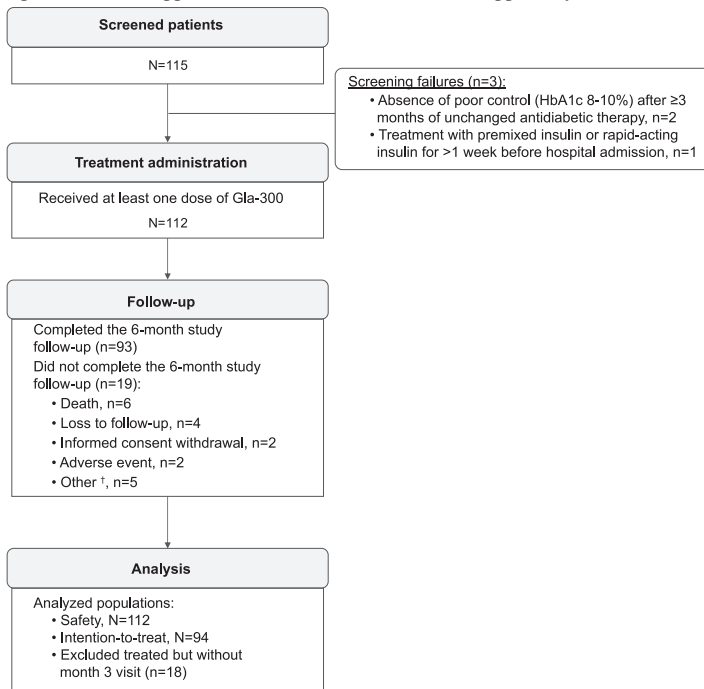

**Supplementary Figure 3.** Summary of patient disposition. †Other reasons for early study withdrawal included protocol deviation (n=1), diagnosis of advanced lung neoplasia after study enrollment (n=1), absence of treatment administration by the patient (n=1), previous treatment with prandial insulin (n=1) and not allowed concomitant medication (n=1). Gla-300, glargine 300 U/ml; HbA1c, glycosylated haemoglobin.
